## Author Correction

**The T-box transcription factor *Brachyury* mediates cartilage development in mesenchymal stem cell line C3H10T1/2**

Hoffmann, A., Czichos, S., Kaps, C., Bachner, D., Mayer, H., Zilberman, Y., Turgeman, G., Pelled, G., Gross, G. and Gazit, D. *J. Cell Sci.* **115**, 769-781.

In the printed version of this article, an author was missing from the title page. The correct list of authors is shown below.

**Andrea Hoffmann<sup>1,\*</sup>, Stefan Czichos<sup>1,2,\*</sup>, Christian Kaps<sup>1</sup>, Dietmar Bächner<sup>2</sup>, Hubert Mayer<sup>1</sup>, Basan Gowda Kurkalli<sup>3</sup>, Yoram Zilberman<sup>3</sup>, Gadi Turgeman<sup>3</sup>, Gadi Pelled<sup>3</sup>, Gerhard Gross<sup>1,‡</sup> and Dan Gazit<sup>3</sup>**

<sup>1</sup>Osteo-Angiogenesis Group, Gesellschaft für Biotechnologische Forschung (GBF), Mascheroder Weg 1, 38124 Braunschweig, Germany

<sup>2</sup>Institute of Cellbiochemistry and Clinical Neurobiology, University Hospital Eppendorf, 22529 Hamburg, Germany

<sup>3</sup>Skeletal Biotech. Laboratory, Hebrew University, Jerusalem, Israel

\*These authors contributed equally to this work

‡Author for correspondence (e-mail: ggr@gbf.de)
